# Supplementary material for: Effect of Weight Maintenance on Symptoms of Knee Osteoarthritis in Obese Patients: A Twelve-Month Randomized Controlled Trial
Source: PubMed Central journal article supplement — Arthritis Care Res (Hoboken). 2015 Apr 24;67(5):640–50. doi: 10.1002/acr.22504 (PMC4657487; doi:10.1002/acr.22504), 2015-04-24
Supplement: acr0067-0640-sd2.pdf [file acr0067-0640-sd2.pdf]

# Interventions

## Exercise

- 3 days/week, 60 mins/session: 10 min warm-up, 45 min circuit training, 5 min cool-down/stretch
- Individualized goal-based program to improve knee function and reduce pain  
Ageberg et al. BMC. Musculoskelet. Disord. 2010
- Total 47 facility based sessions and 109 home based sessions

|                 | 12 weeks | 12 weeks | 12 weeks | 12 weeks | 4 weeks |
|-----------------|----------|----------|----------|----------|---------|
| Facility based* | 2        | 1        | 1/2      | 1/3      | 1/4     |
| Home based*     | 1        | 2        | 3        | 3        | 3       |

*\*Counted as sessions per week*

## Dietary consultancy

- Weekly meetings with dietician, 60 mins/session
- Focus on long-term lifestyle modifications
- 1 formula product/day (Cambridge Weight Plan)
- Total 52 facility based sessions
